# Supplementary material for: Uranyl adsorption at solvated edge surfaces of 2 : 1 smectites. A density functional study
Source: Royal Society of Chemistry journal article supplement (doi:10.1039/c5cp01074h), 2015-01-01
Supplement: c5cp01074h1.pdf [file c5cp01074h1.pdf]

## Electronic Supplementary Information

### Uranyl Adsorption at Solvated Edge Surfaces of 2:1 Smectites. A Density Functional Study

Alena Kremleva,<sup>a</sup> Sven Krüger,<sup>a</sup> Notker Rösch<sup>b,c,\*</sup>

<sup>a</sup> *Department Chemie, Technische Universität München, 85747 Garching, Germany*

<sup>b</sup> *Department Chemie and Catalysis Research Center, Technische Universität München, 85747 Garching, Germany*

<sup>c</sup> *Institute of High Performance Computing, Agency for Science, Technology and Research, 1 Fusionopolis Way, #16-16 Connexis, Singapore 138632, Singapore*

\* Corresponding author. Email: roesch@mytum.de, Tel: +49 89 2891 3620, Fax: +49 89 2891 3468

The bulk structures of pyrophyllitic (pyro), beidellitic (beid), and montmorillonitic (montm) models used in the present study are shown in Fig. S1. The optimized lattice parameters are given in Table S1.

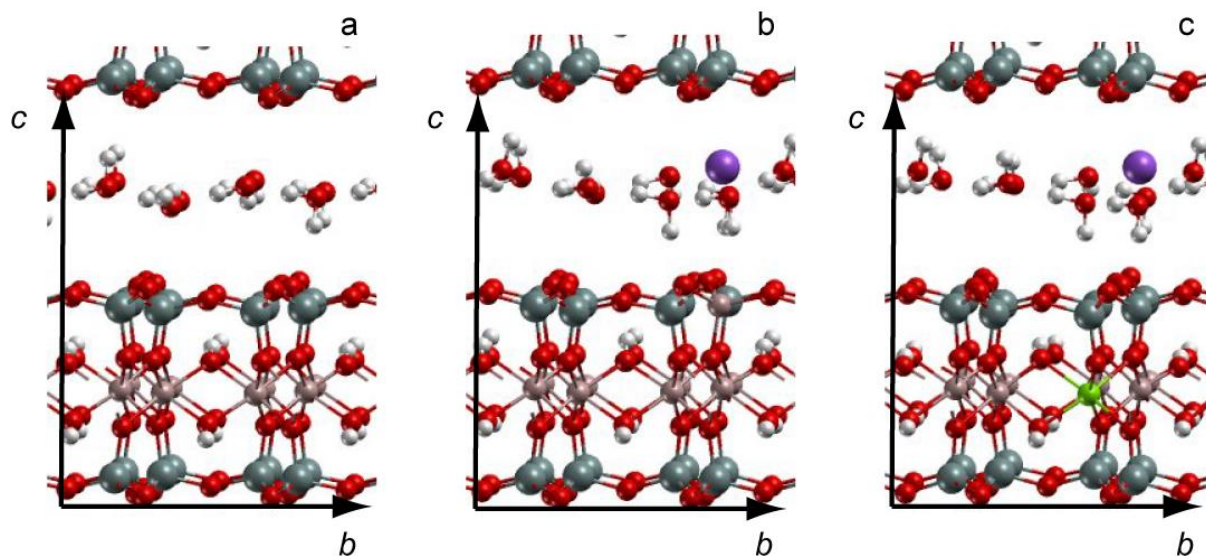

**Figure S1.** Optimized bulk structures of (a) the neutral pyrophyllitic model with a water interlayer, (b) the beidellitic smectite model with  $\text{Na}^+$  counterion and interlayer water, (c) montmorillonitic smectite model with  $\text{Na}^+$  counterion and interlayer water. Color coding: red – O, grey – Si, brown – Al, green – Mg, violet – Na, white – H.

**Table S1.** Optimized lattice parameters of the three models of 2:1 clay minerals used in the present study. The stoichiometric formula of all models is  $\text{Na}_1(\text{Si}_{8-n}\text{Al}_n)(\text{Al}_{4-m}\text{Mg}_m)\text{O}_{20}(\text{OH})_4$ , lattice vectors are given in pm, angles in degree. The unit cells are monoclinic.

| clay  | <i>A</i> | <i>b</i> | <i>c</i> | $\beta$ |
|-------|----------|----------|----------|---------|
| pyro  | 1047.7   | 903.0    | 1309.2   | 99.2    |
| beid  | 1047.6   | 903.7    | 1323.4   | 99.1    |
| montm | 1050.8   | 905.2    | 1330.6   | 97.2    |

The lattice parameters of all three models are very similar, except for the *c* vector that determines essentially the distance between the layers. The neutral pyrophyllitic model exhibits the shortest *c* vector, 1309 pm, as it accommodates only water between the layers. Due to the presence of  $\text{Na}^+$  counter ions, the beidellitic and montmorillonitic models exhibit longer *c* vectors, 1323 pm and 1330 pm, respectively.

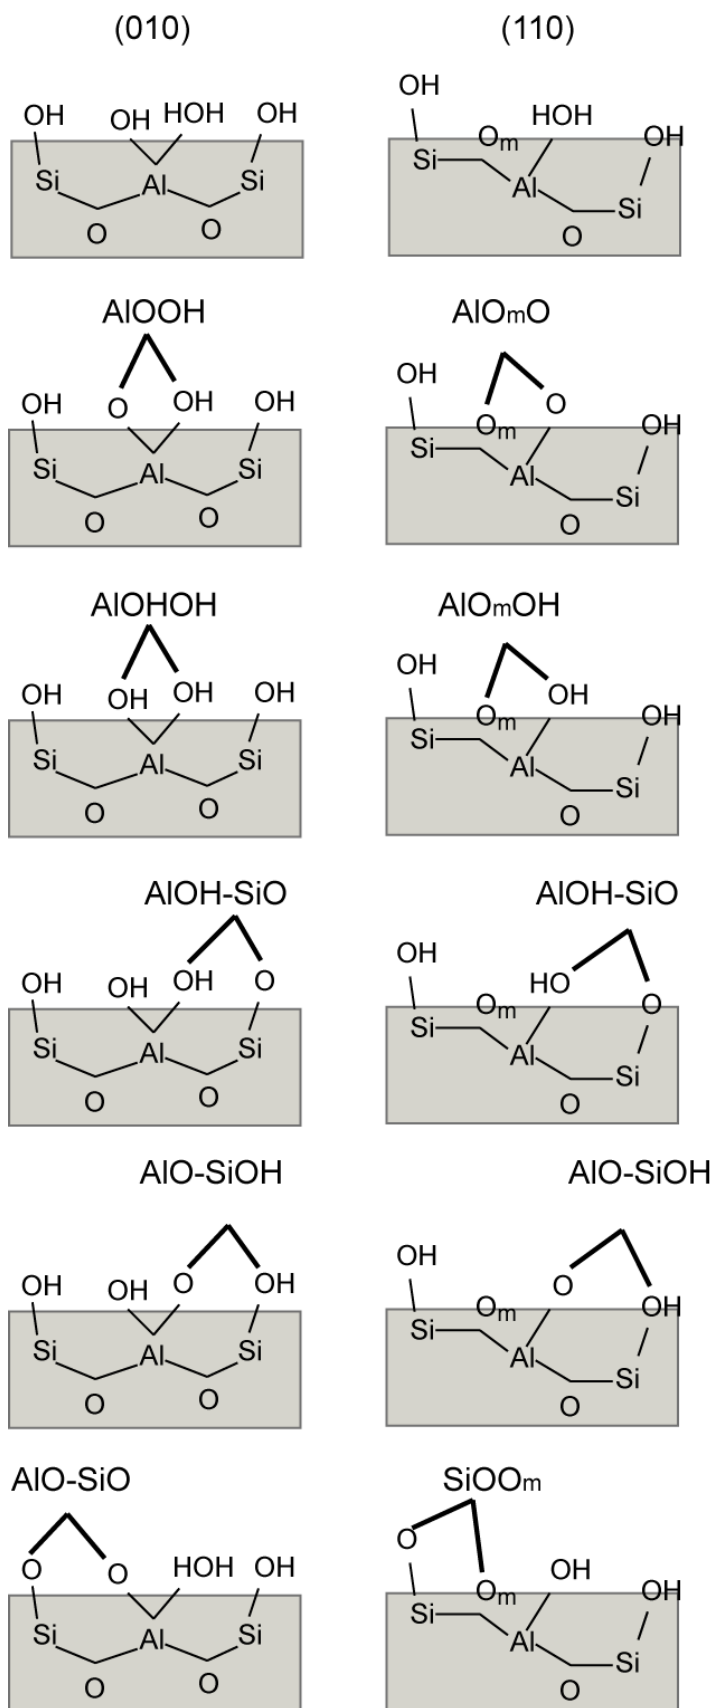

**Figure S2.** Schematic representations of adsorption sites on the (010) and (110) surfaces of 2:1 clay mineral models.

**Table S2.** Structural parameters (pm) of uranyl adsorption complexes on various sites of (010) edge surfaces of 2:1 smectites. Average terminal uranyl bond length U-O<sub>t</sub>, bond lengths U-O<sub>s</sub> to surface oxygen centers, U-OH distance to OH ligands arising from deprotonated aqua ligands, bond lengths U-O<sub>w</sub> to aqua ligands, average equatorial U-O bond length U-O<sub>eq</sub>, U-Al and U-Si distances to the nearest surface Al and Si centers. Formations energies (kJ mol<sup>-1</sup>) are calculated according to Eq. 1 of the main text.

| <b>AIOOH</b>  | <b>UO<sub>2</sub><sup>2+</sup></b>  | <b>Defect</b> | <b>U=O</b> | <b>U-O<sub>AlO</sub></b>  | <b>U-O<sub>AlOH</sub></b> | <b>U-OH</b> | <b>U-O<sub>w</sub></b> | <b>U-O<sub>eq</sub></b> | <b>U-Mg</b> | <b>U-Al</b> | <b>U-Si</b> | <b>E<sub>form</sub></b> |
|---------------|-------------------------------------|---------------|------------|---------------------------|---------------------------|-------------|------------------------|-------------------------|-------------|-------------|-------------|-------------------------|
| pyro          | 5                                   |               | 185        | 204                       | 239                       |             | 260, 261, 270          | 247                     |             | 325         |             | 212                     |
| beid          | 5                                   | Deep          | 186        | 203                       | 243                       |             | 252, 258, 269          | 245                     |             | 323         |             | 166                     |
|               | 5                                   | surf1         | 186        | 203                       | 243                       |             | 255, 260, 267          | 246                     |             | 322         |             | 162                     |
|               | 5                                   | surf2         | 186        | 203                       | 240                       |             | 252, 258, 272          | 245                     |             | 322         |             | 153                     |
| montm         | 5                                   | Deep          | 188        | 202                       | 238                       |             | 246, 258, 261          | 241                     |             | 325         |             | 133                     |
| MgOOH         | 5                                   | Surf          | 190        | 198                       | 232                       |             | 249, 261, 267          | 241                     | 326         |             |             | 208                     |
| <b>AIOHOH</b> | <b>UO<sub>2</sub><sup>2+</sup></b>  |               |            | <b>U-O<sub>AlOH</sub></b> | <b>U-O<sub>AlOH</sub></b> |             |                        |                         |             |             |             |                         |
| pyro          | 5                                   |               | 181        | 229                       | 236                       |             | 249, 252, 255          | 244                     |             | 344         |             | 199                     |
| beid          | 5                                   | deep          | 182        | 227                       | 237                       |             | 247, 252, 257          | 244                     |             | 345         |             | 189                     |
|               | 5                                   | surf1         | 183        | 223                       | 239                       |             | 247, 249, 261          | 244                     |             | 342         |             | 142                     |
|               | 5                                   | surf2         | 182        | 227                       | 235                       |             | 246, 252, 261          | 244                     |             | 342         |             | 264                     |
| montm         | 5                                   | deep          | 182        | 227                       | 239                       |             | 238, 250, 253          | 241                     |             | 346         |             | 128                     |
| MgOHOH        | 5                                   | surf          | 183        | 222                       | 230                       |             | 241, 257, 260          | 242                     | 344         |             |             | 182                     |
| <b>AIOHOH</b> | <b>UO<sub>2</sub>OH<sup>+</sup></b> |               |            | <b>U-O<sub>AlOH</sub></b> | <b>U-O<sub>AlOH</sub></b> |             |                        |                         |             |             |             |                         |
| pyro          | 5                                   |               | 183        | 238                       | 239                       | 224         | 253, 263               | 243                     |             | 346         |             | 102                     |
| beid          | 5                                   | deep          | 184        | 240                       | 240                       | 217         | 258, 263               | 244                     |             | 348         |             | 182                     |
|               | 5                                   | surf1         | 184        | 239                       | 240                       | 219         | 256, 261               | 243                     |             | 348         |             | 152                     |
|               | 5                                   | surf2         | 184        | 241                       | 241                       | 216         | 260, 262               | 244                     |             | 349         |             | 182                     |
| montm         | 5                                   | deep          | 185        | 234                       | 242                       | 217         | 253, 254               | 240                     |             | 349         |             | 101                     |
| MgOHOH        | 5                                   | surf          | 186        | 230                       | 234                       | 219         | 258, 258               | 240                     | 347         |             |             | 175                     |

| <b>AIO-SiO</b>  | <b>UO<sub>2</sub><sup>2+</sup></b>  | <b>Defect</b> | <b>U=O</b> | <b>U-O<sub>AIO</sub></b>  | <b>U-O<sub>SiO</sub></b>  | <b>U-OH</b> | <b>U-O<sub>w</sub></b> | <b>U-O<sub>eq</sub></b> | <b>U-Mg</b> | <b>U-Al</b> | <b>U-Si</b> | <b>E<sub>form</sub></b> |
|-----------------|-------------------------------------|---------------|------------|---------------------------|---------------------------|-------------|------------------------|-------------------------|-------------|-------------|-------------|-------------------------|
| pyro            | 4                                   |               | 189        | 202                       | 222                       |             | 246, 256               | 232                     |             | 360         | 339         | 157                     |
| beid            | 4                                   | deep          | 187        | 205                       | 225                       |             | 240, 247               | 229                     |             | 367         | 332         | 176                     |
| AIO-AIO         | 4                                   | surf1         | 189        | 209                       | 213                       |             | 242, 249               | 228                     |             | 332, 364    |             | 206                     |
|                 | 4                                   | surf2         | 187        | 207                       | 225                       |             | 239, 244               | 229                     |             | 367         | 336         | 137                     |
| montm           | 4                                   | deep          | 187        | 205                       | 225                       |             | 244, 254               | 232                     |             | 385         | 340         | 135                     |
| MgO-SiO         | 4                                   | surf          | 189        | 198                       | 228                       |             | 244, 255               | 231                     | 391         |             | 344         | 162                     |
| <b>AIOH-SiO</b> | <b>UO<sub>2</sub>OH<sup>+</sup></b> |               |            | <b>U-O<sub>AIOH</sub></b> | <b>U-O<sub>SiO</sub></b>  |             |                        |                         |             |             |             |                         |
| pyro            | 5                                   |               | 184        | 246                       | 234                       | 221         | 239, 268               | 242                     |             | 408         | 349         | 142                     |
| beid            | 5                                   | deep          | 185        | 242                       | 226                       | 218         | 259, 264               | 242                     |             | 387         | 348         | 152                     |
|                 | 5                                   | surf1         | 185        | 242                       | 226                       | 216         | 259, 264               | 241                     |             | 387         | 349         | 143                     |
| AIOH-AIO        | 5                                   | surf2         | 186        | 244                       | 211                       | 224         | 261, 274               | 243                     |             | 382, 345    |             | 204                     |
| montm           | 5                                   | deep          | 182        | 251                       | 227                       | 227         | 250, 273               | 246                     |             | 435         | 364         | 167                     |
| MgOH-SiO        | 5                                   | surf          | 183        | 239                       | 234                       | 226         | 254, 270               | 245                     | 435         |             | 369         | 180                     |
| <b>AIOH-SiO</b> | <b>UO<sub>2</sub>OH<sup>+</sup></b> |               |            | <b>U-O<sub>AIOH</sub></b> | <b>U-O<sub>SiO</sub></b>  |             |                        |                         |             |             |             |                         |
| pyro            | 4                                   |               | 186        | 235                       | 223                       | 214         | 248                    | 230                     |             | 386         | 340         | 146                     |
| beid            | 4                                   | deep          | 184        | 243                       | 221                       | 217         | 251                    | 233                     |             | 396         | 343         | 197                     |
|                 | 4                                   | surf1         | 184        | 244                       | 220                       | 217         | 251                    | 233                     |             | 399         | 344         | 191                     |
| AIOH-AIO        | 4                                   | surf2         | 185        | 250                       | 211                       | 220         | 256                    | 234                     |             | 391, 338    |             | 180                     |
| montm           | 4                                   | deep          | 186        | 235                       | 217                       | 224         | 243                    | 230                     |             | 420         | 351         | 139                     |
| MgOH-SiO        | 4                                   | surf          | 186        | 226                       | 220                       | 224         | 244                    | 229                     | 422         |             | 357         | 165                     |
| <b>AIO-SiOH</b> | <b>UO<sub>2</sub><sup>2+</sup></b>  |               |            | <b>U-O<sub>AIO</sub></b>  | <b>U-O<sub>SiOH</sub></b> |             |                        |                         |             |             |             |                         |
| pyro            | 4                                   |               | 186        | 199                       | 254                       |             | 242, 244               | 235                     |             | 385         | 365         | 108                     |
| beid            | 4                                   | deep          | 186        | 200                       | 244                       |             | 241, 254               | 235                     |             | 368         | 356         | 189                     |
|                 | 4                                   | surf1         | 186        | 199                       | 244                       |             | 240, 253               | 234                     |             | 370         | 358         | 175                     |
| AIO-AIOH        | 4                                   | surf2         | 187        | 201                       | 231                       |             | 245, 255               | 233                     |             | 368, 353    |             | 199                     |
| montm           | 4                                   | deep          | 186        | 199                       | 254                       |             | 242, 244               | 235                     |             | 385         | 365         | 183                     |
| MgO-SiOH        | 4                                   | surf          | 187        | 195                       | 261                       |             | 241, 246               | 236                     | 390         |             | 373         | 241                     |

**Table S3.** Structural parameters (pm) of uranyl adsorption complexes on various sites of (110) edge surfaces of 2:1 smectites. Average terminal uranyl bond length U-O<sub>t</sub>, bond lengths U-O<sub>s</sub> to surface oxygen centers, U-OH distance to OH ligands arising from deprotonated aqua ligands, bond lengths U-O<sub>w</sub> to aqua ligands, average equatorial U-O bond length U-O<sub>eq</sub>, U-Al and U-Si distances to the nearest surface Al and Si centers. Formations energies (kJ mol<sup>-1</sup>) are calculated according to Eq. 1 of the main text.

| AlO <sub>m</sub> O   | UO <sub>2</sub> <sup>2+</sup>   | Defect | U=O | U-O <sub>AlO</sub>  | U-O <sub>AlOm</sub> | U-OH | U-O <sub>w</sub> | U-O <sub>eq</sub> | U-Mg | U-Al | U-Si | E <sub>form</sub> |
|----------------------|---------------------------------|--------|-----|---------------------|---------------------|------|------------------|-------------------|------|------|------|-------------------|
| pyro                 | 5                               |        | 184 | 203                 | 266                 |      | 250, 250, 255    | 245               |      | 328  |      | 183               |
| beid                 | 5                               | deep   | 185 | 202                 | 249                 |      | 258, 258, 264    | 246               |      | 326  |      | 185               |
|                      | 5                               | surf1  | 185 | 202                 | 257                 |      | 255, 256, 262    | 246               |      | 329  |      | 227               |
| AlO <sub>Al</sub> O  | 5                               | surf2  | 186 | 205                 | 232                 |      | 253, 264, 270    | 245               |      | 314  |      | 147               |
| montm                | 5                               | deep   | 187 | 199                 | 251                 |      | 247, 257, 277    | 246               |      | 330  |      | 233               |
|                      | 4                               | deep   | 185 | 202                 | 235                 |      |                  | 240               |      | 329  |      | 212               |
| MgO <sub>m</sub> O   | 4                               | surf   | 186 | 197                 | 238                 |      | 250, 260         | 236               | 332  |      |      | 253               |
| AlO <sub>m</sub> OH  | UO <sub>2</sub> OH <sup>+</sup> |        | U=O | U-O <sub>AlOH</sub> | U-O <sub>AlOm</sub> | U-OH | U-O <sub>w</sub> | U-O <sub>eq</sub> | U-Mg | U-Al | U-Si | E <sub>form</sub> |
| pyro                 | 5                               |        | 182 | 237                 | 268                 | 224  | 240, 248         | 243               |      | 353  |      | 123               |
| beid                 | 5                               | deep   | 183 | 233                 | 259                 | 226  | 238, 253         | 242               |      | 349  |      | 157               |
|                      | 5                               | surf1  | 183 | 230                 | 262                 | 226  | 239, 256         | 243               |      | 351  |      | 200               |
| AlO <sub>Al</sub> OH | 5                               | surf2  | 184 | 239                 | 237                 | 229  | 242, 253         | 240               |      | 336  |      | 134               |
| montm                | 5                               | deep   | 181 | 232                 | 247                 | 226  | 263, 265         | 247               |      | 352  |      | 213               |
| MgO <sub>m</sub> OH  | 5                               | surf   | 181 | 229                 | 238                 | 230  | 266, 270         | 247               | 348  |      |      | 199               |
| SiO <sub>m</sub> O   | UO <sub>2</sub> OH <sup>+</sup> |        | U=O | U-O <sub>SiO</sub>  | U-O <sub>SiOm</sub> | U-OH | U-O <sub>w</sub> | U-O <sub>eq</sub> | U-Mg | U-Al | U-Si | E <sub>form</sub> |
| pyro                 | 5                               |        | 181 | 234                 | 261                 | 226  | 253, 256         | 246               |      |      | 313  | 131               |
| beid                 | 5                               | deep   | 182 | 229                 | 251                 | 225  | 262, 266         | 247               |      |      | 308  | 182               |
|                      | 5                               | surf1  | 182 | 232                 | 255                 | 221  | 261, 265         | 247               |      |      | 308  | 182               |
| AlOO                 | 5                               | surf2  | 183 | 220                 | 242                 | 231  | 270, 270         | 247               |      | 305  |      | 167               |
| montm                | 5                               | deep   | 182 | 225                 | 261                 | 229  | 246, 277         | 248               |      |      | 311  | 221               |
| SiO <sub>Mg</sub> O  | 5                               | surf   | 183 | 230                 | 241                 | 228  | 247, 295         | 248               |      |      | 303  | 207               |

| <b>AlOH-SiO</b> | <b>UO<sub>2</sub><sup>2+</sup></b> | <b>Defect</b> | <b>U=O</b> | <b>U-O<sub>AlOH</sub></b> | <b>U-O<sub>SiO</sub></b>  | <b>U-O<sub>w</sub></b> | <b>U-O<sub>eq</sub></b> | <b>U-Mg</b> | <b>U-Al</b> | <b>U-Si</b> | <b>E<sub>form</sub></b> |
|-----------------|------------------------------------|---------------|------------|---------------------------|---------------------------|------------------------|-------------------------|-------------|-------------|-------------|-------------------------|
| pyro            | 5                                  |               | 183        | 233                       | 216                       | 246, 249, 268          | 242                     |             | 392         | 363         | 105                     |
| beid            | 5                                  | deep          | 182        | 227                       | 218                       | 253, 265, 271          | 247                     |             | 393         | 363         | 122                     |
| AlOH-AlO        | 5                                  | surf1         | 184        | 234                       | 205                       | 257, 267, 273          | 247                     |             | 389, 363    |             | 159                     |
|                 | 5                                  | surf2         | 181        | 229                       | 219                       | 251, 256, 268          | 245                     |             | 384         | 362         | 97                      |
| montm           | 5                                  | deep          | 183        | 225                       | 219                       | 247, 261, 273          | 245                     |             | 398         | 359         | 160                     |
| MgOH-SiO        | 5                                  | surf          | 184        | 225                       | 223                       | 244, 256, 267          | 243                     | 399         |             | 369         | 167                     |
| <b>AlOH-SiO</b> | <b>UO<sub>2</sub><sup>2+</sup></b> |               |            | <b>U-O<sub>AlOH</sub></b> | <b>U-O<sub>SiO</sub></b>  |                        |                         |             |             |             |                         |
| pyro            | 4                                  |               | 183        | 231                       | 213                       | 241, 242               | 232                     |             | 392         | 359         | 116                     |
| beid            | 4                                  | deep          | 183        | 224                       | 216                       | 241, 263               | 236                     |             | 394         | 360         | 150                     |
| AlOH-AlO        | 4                                  | surf1         | 185        | 230                       | 205                       | 245, 262               | 236                     |             | 389, 362    |             | 178                     |
|                 | 4                                  | surf2         | 182        | 226                       | 217                       | 241, 252               | 234                     |             | 383         | 359         | 68                      |
| montm           | 4                                  | deep          | 183        | 226                       | 221                       | 235, 246               | 232                     |             | 393         | 356         | 175                     |
| MgOH-SiO        | 4                                  | surf          | 184        | 223                       | 216                       | 238, 247               | 231                     | 399         |             | 362         | 173                     |
| <b>AlO-SiOH</b> | <b>UO<sub>2</sub><sup>2+</sup></b> |               |            | <b>U-O<sub>AlO</sub></b>  | <b>U-O<sub>SiOH</sub></b> |                        |                         |             |             |             |                         |
| pyro            | 5                                  |               | 185        | 200                       | 253                       | 250, 251, 268          | 244                     |             | 381         | 370         | 142                     |
| beid            | 5                                  | deep          | 187        | 198                       | 251                       | 247, 254, 260          | 242                     |             | 380         | 379         | 139                     |
| AlO-AlOH        | 5                                  | surf1         | 188        | 199                       | 237                       | 249, 253, 264          | 240                     |             | 380, 374    |             | 152                     |
|                 | 5                                  | surf2         | 185        | 201                       | 259                       | 247, 251, 254          | 242                     |             | 380         | 387         | 87                      |
| montm           | 5                                  | deep          | 185        | 199                       | 258                       | 253, 253, 274          | 247                     |             | 382         | 387         | 213                     |
| MgO-SiOH        | 5                                  | surf          | 186        | 197                       | 263                       | 256, 259, 261          | 247                     | 391         |             | 393         | 225                     |
| <b>AlO-SiOH</b> | <b>UO<sub>2</sub><sup>2+</sup></b> |               |            | <b>U-O<sub>AlO</sub></b>  | <b>U-O<sub>SiOH</sub></b> |                        |                         |             |             |             |                         |
| pyro            | 4                                  |               | 185        | 199                       | 245                       | 239, 250               | 233                     |             | 387         | 366         | 173                     |
| beid            | 4                                  | deep          | 186        | 198                       | 245                       | 246, 248               | 234                     |             | 380         | 369         | 105                     |
| AlO-AlOH        | 4                                  | surf1         | 187        | 199                       | 234                       | 250, 250               | 233                     |             | 377, 363    |             | 158                     |
|                 | 4                                  | surf2         | 186        | 199                       | 245                       | 246, 247               | 234                     |             | 378         | 367         | 116                     |
| montm           | 4                                  | deep          | 185        | 198                       | 249                       | 251, 251               | 237                     |             | 380         | 379         | 181                     |
| MgO-SiOH        | 4                                  | surf          | 186        | 194                       | 252                       | 251, 255               | 238                     |             | 387         | 384         | 207                     |
